# Supplementary material
Source: ML conference proceedings conference paper supplement (https://openreview.net/forum?id=AeTl9sbF-VT)

a) MNIST,  $\sigma = 0.5$ 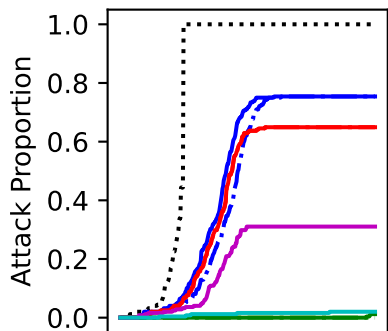b) MNIST,  $\sigma = 1.0$ 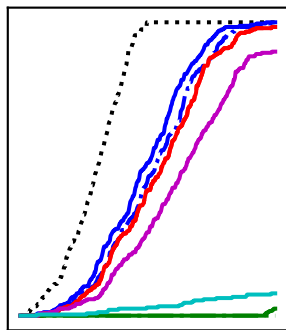c) CIFAR-10,  $\sigma = 0.5$ 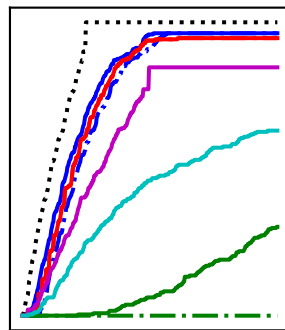d) CIFAR-10,  $\sigma = 1.0$ 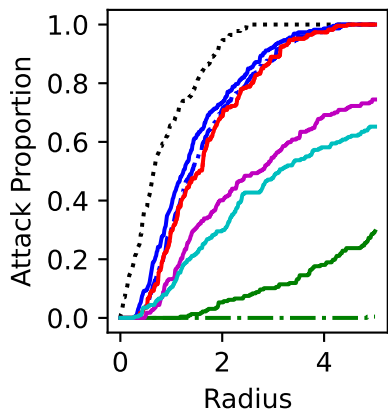e) T-I,  $\sigma = 0.5$ 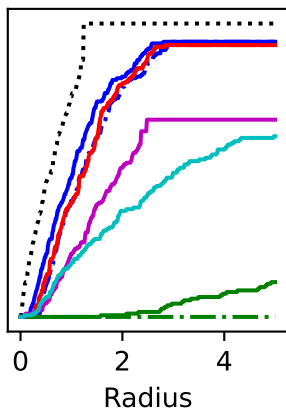f) T-I,  $\sigma = 1.0$ 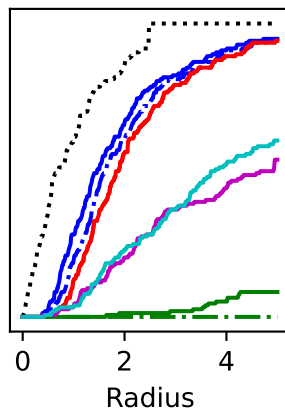

Supplement: supplementary_material [file attachment]

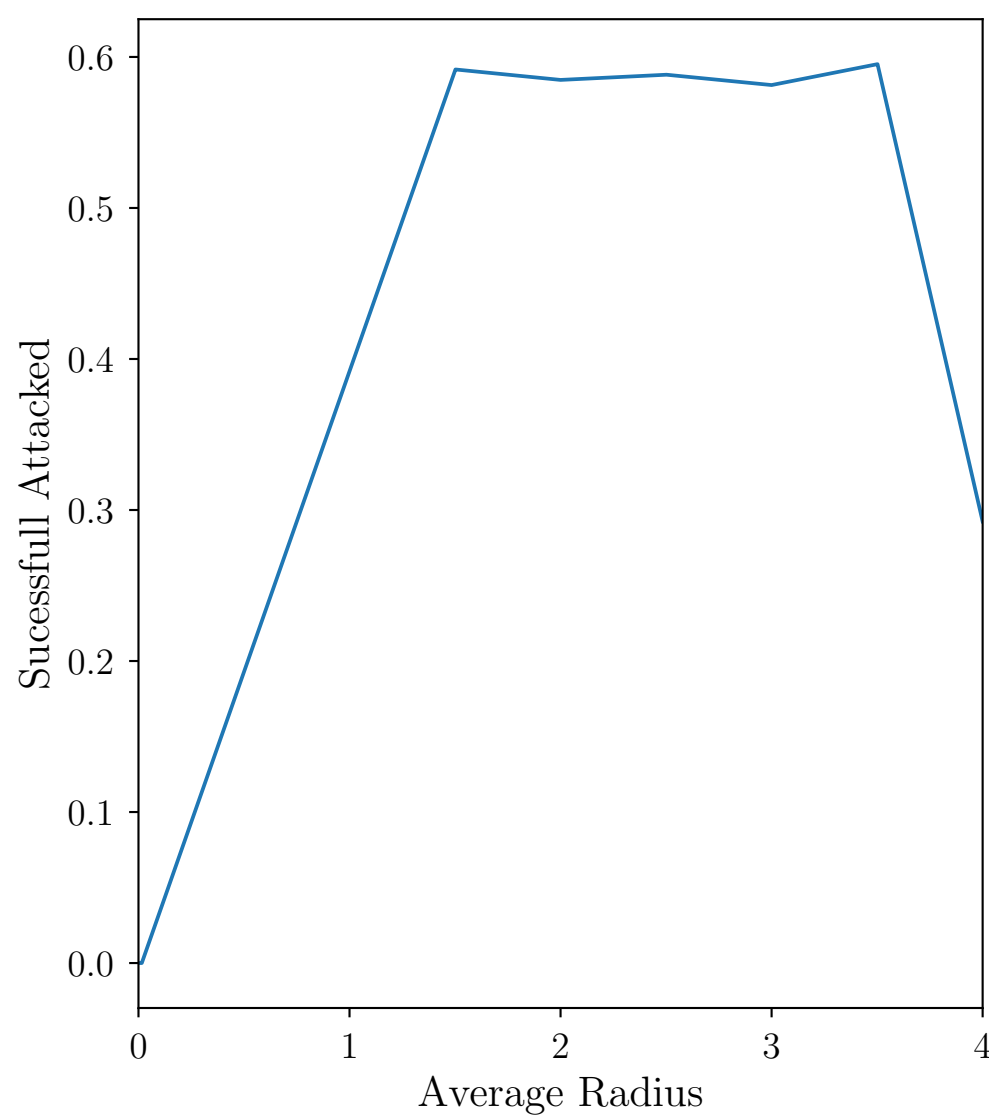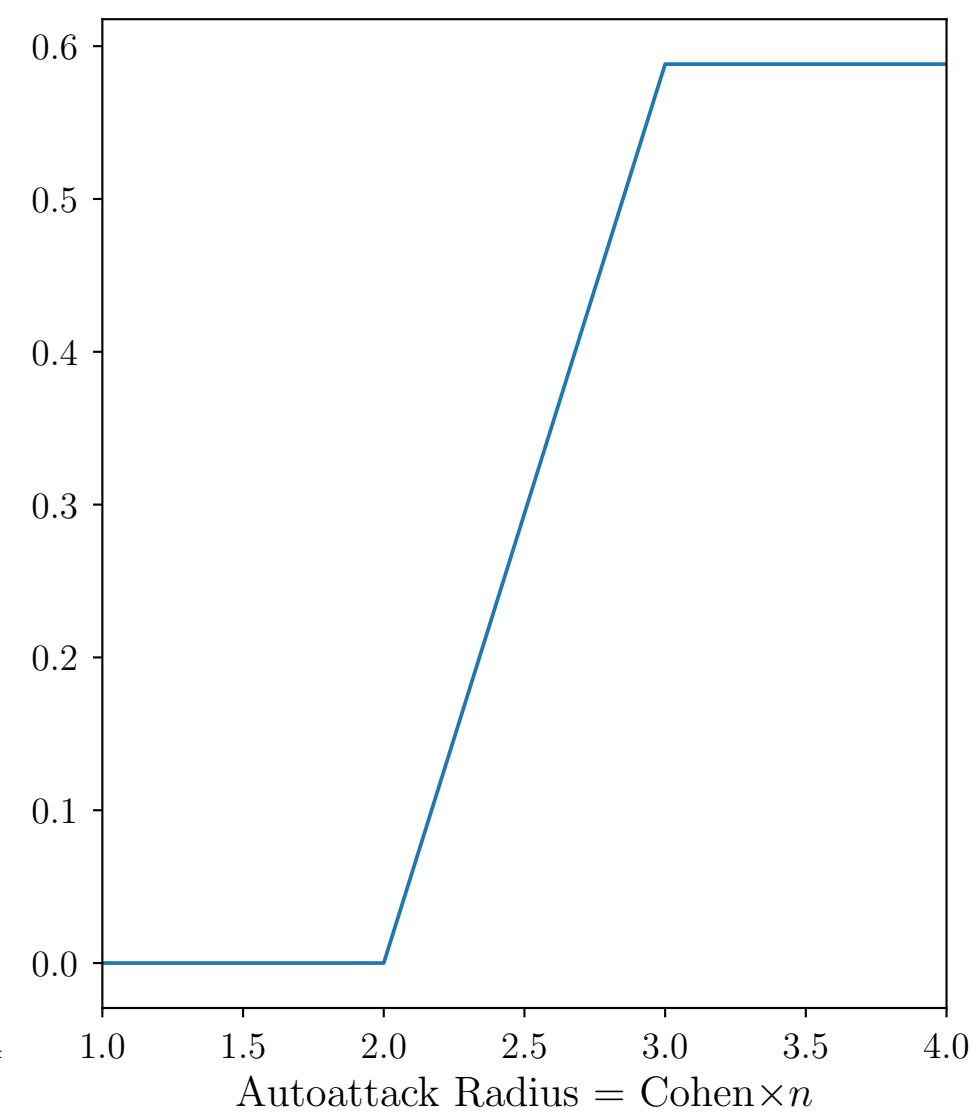

Supplement: supplementary_material [file attachment]

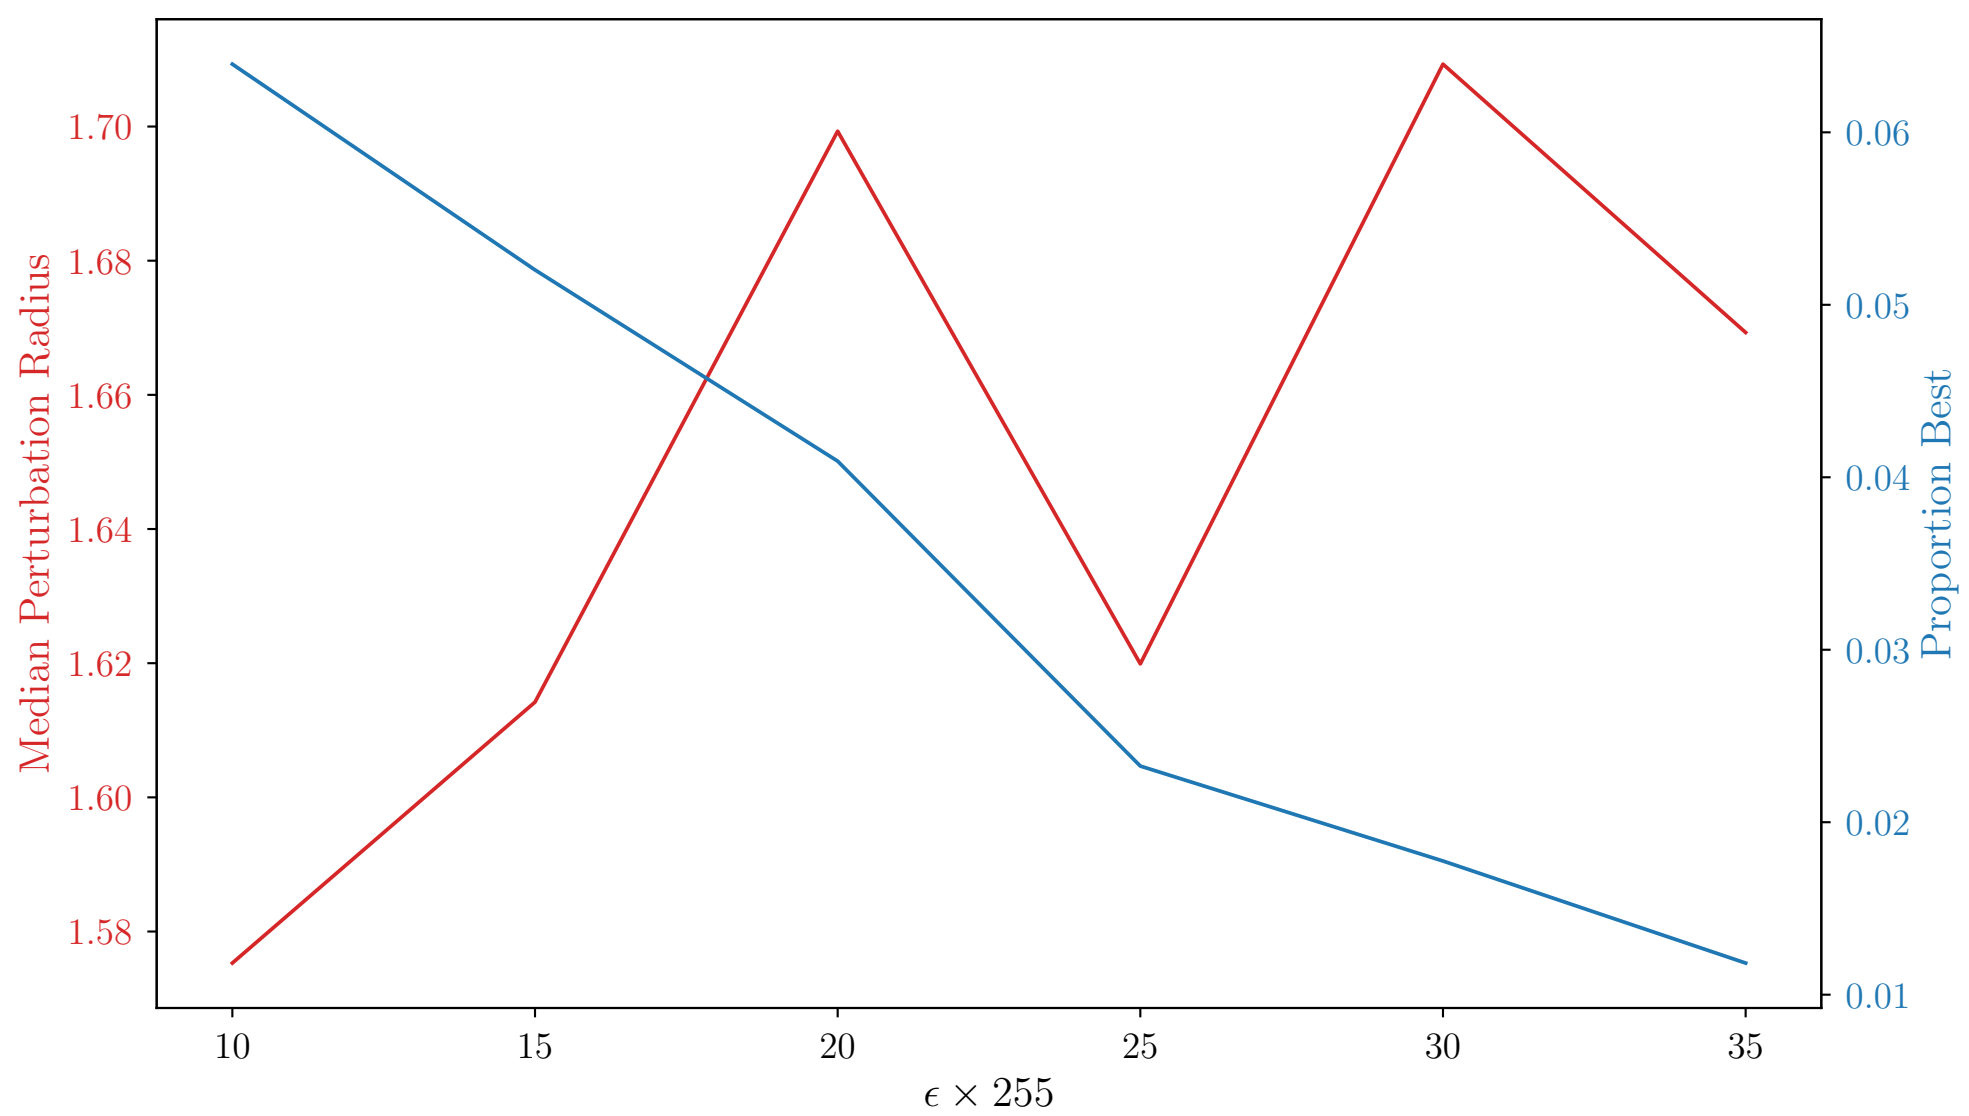

Supplement: supplementary_material [file attachment]

a) M,  $\sigma = 0.5$ 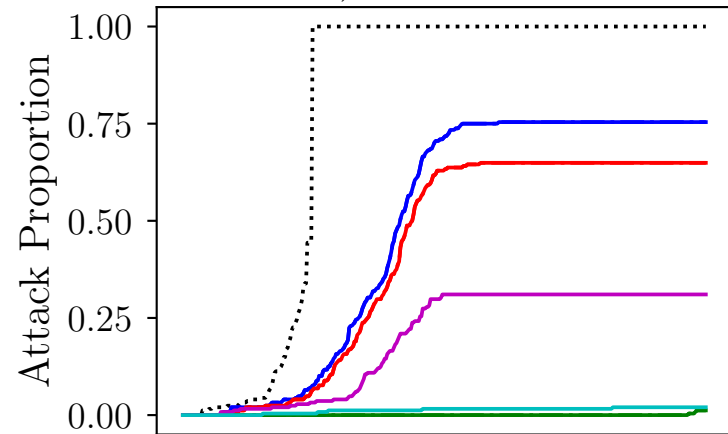b) M,  $\sigma = 1.0$ 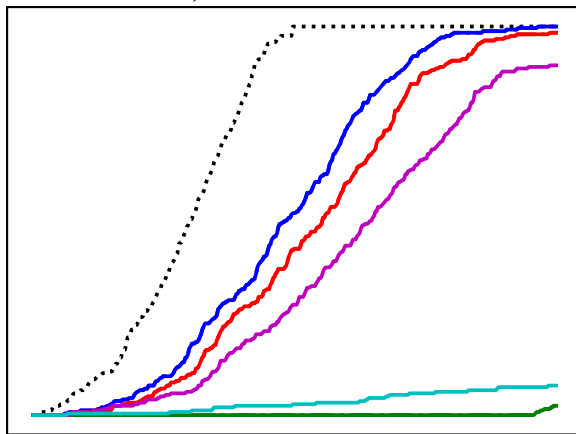c) C,  $\sigma = 0.5$ 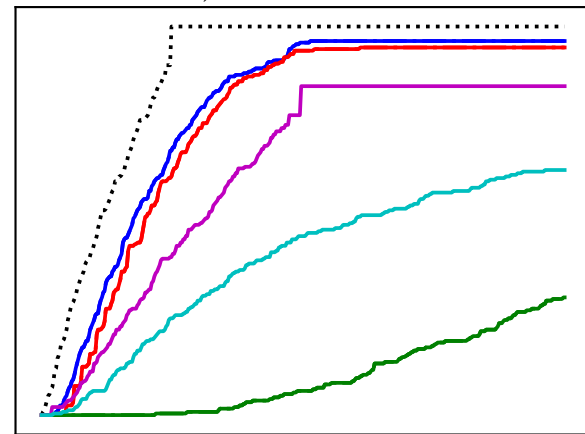d) C,  $\sigma = 1.0$ 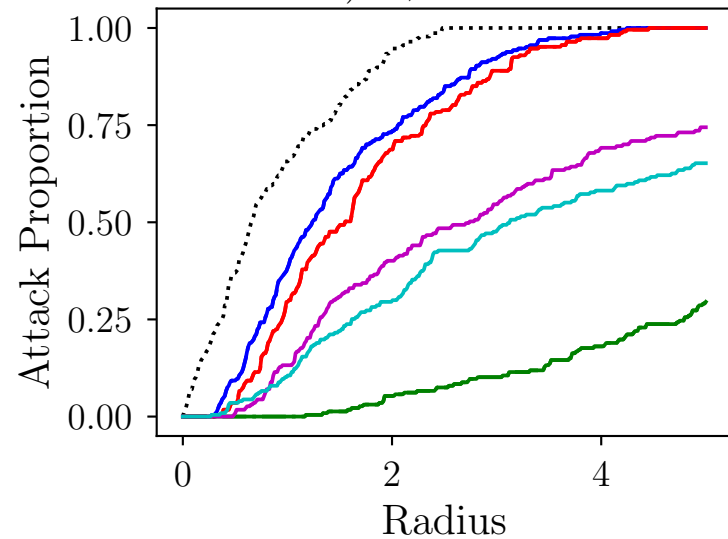e) T-I,  $\sigma = 0.5$ 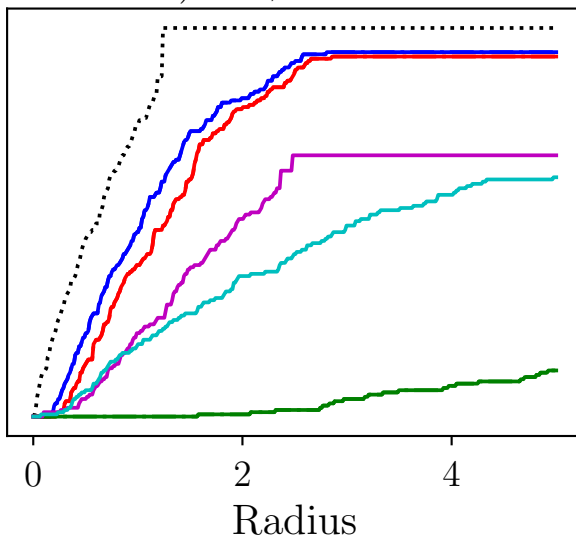f) T-I,  $\sigma = 1.0$ 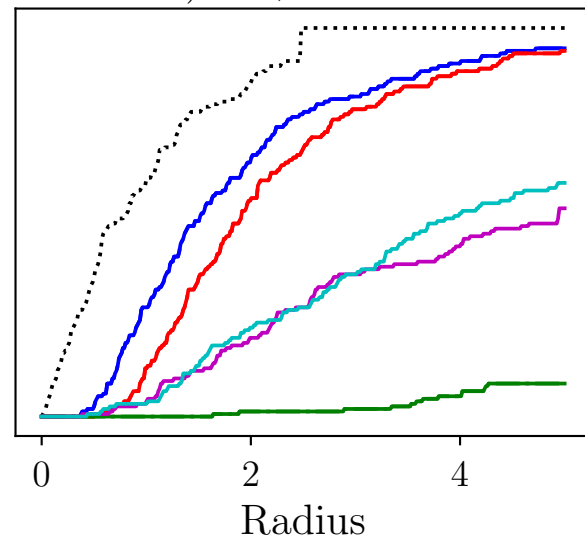

Supplement: supplementary_material [file attachment]

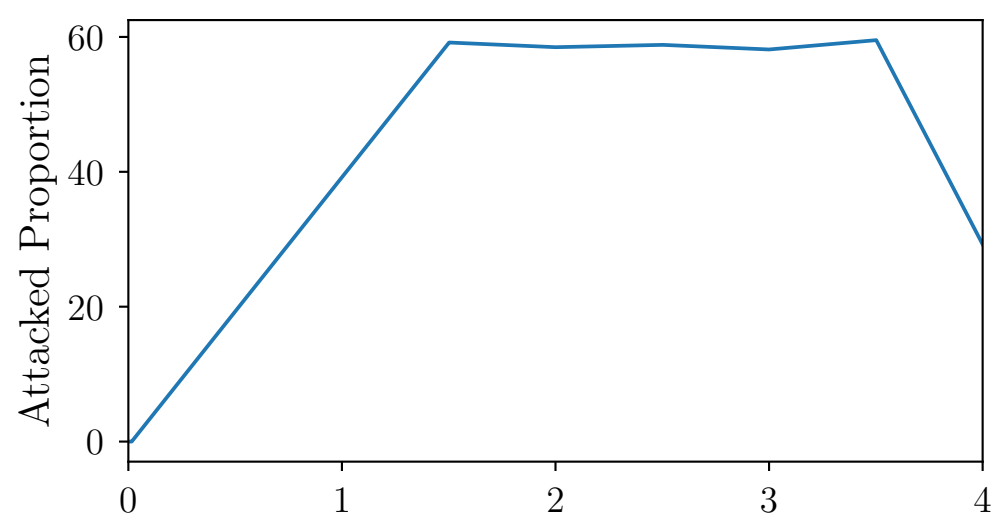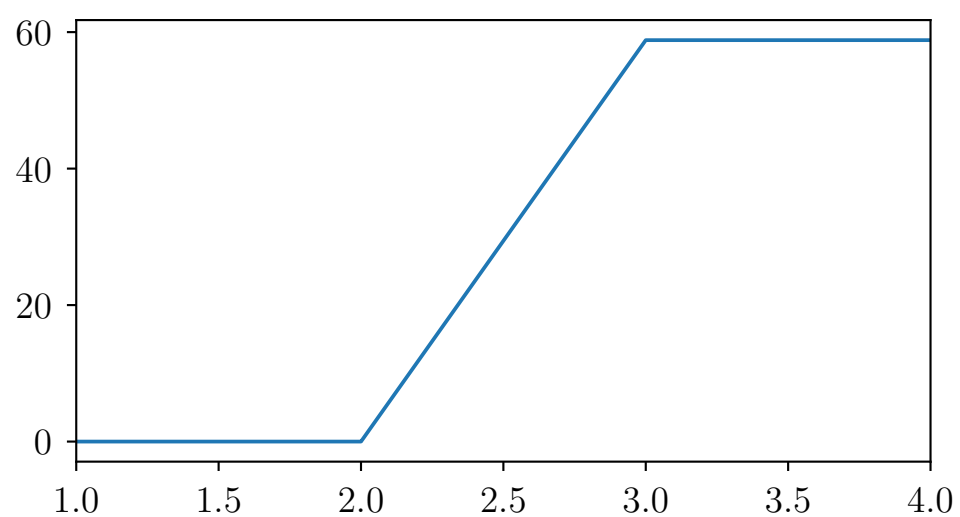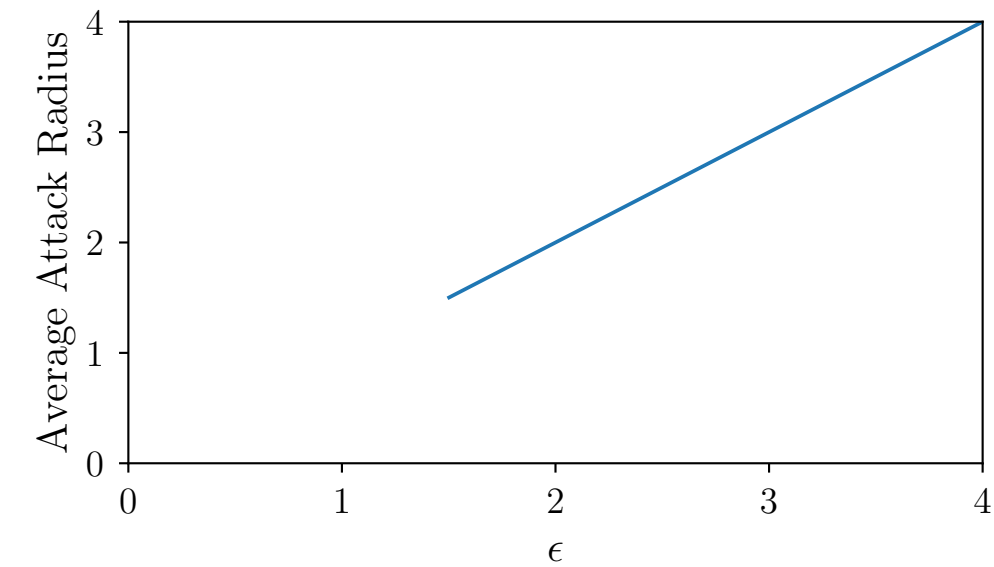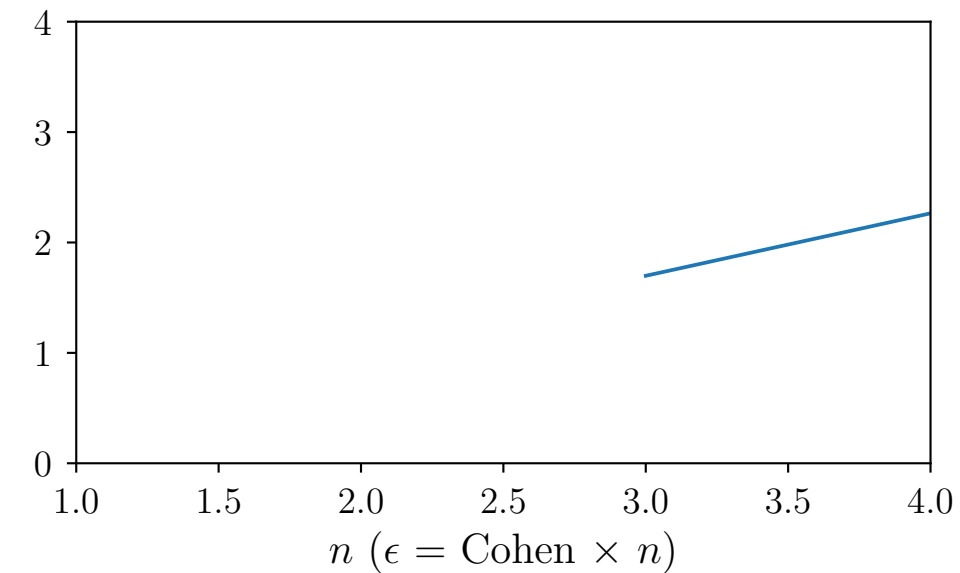

Supplement: supplementary_material [file attachment]

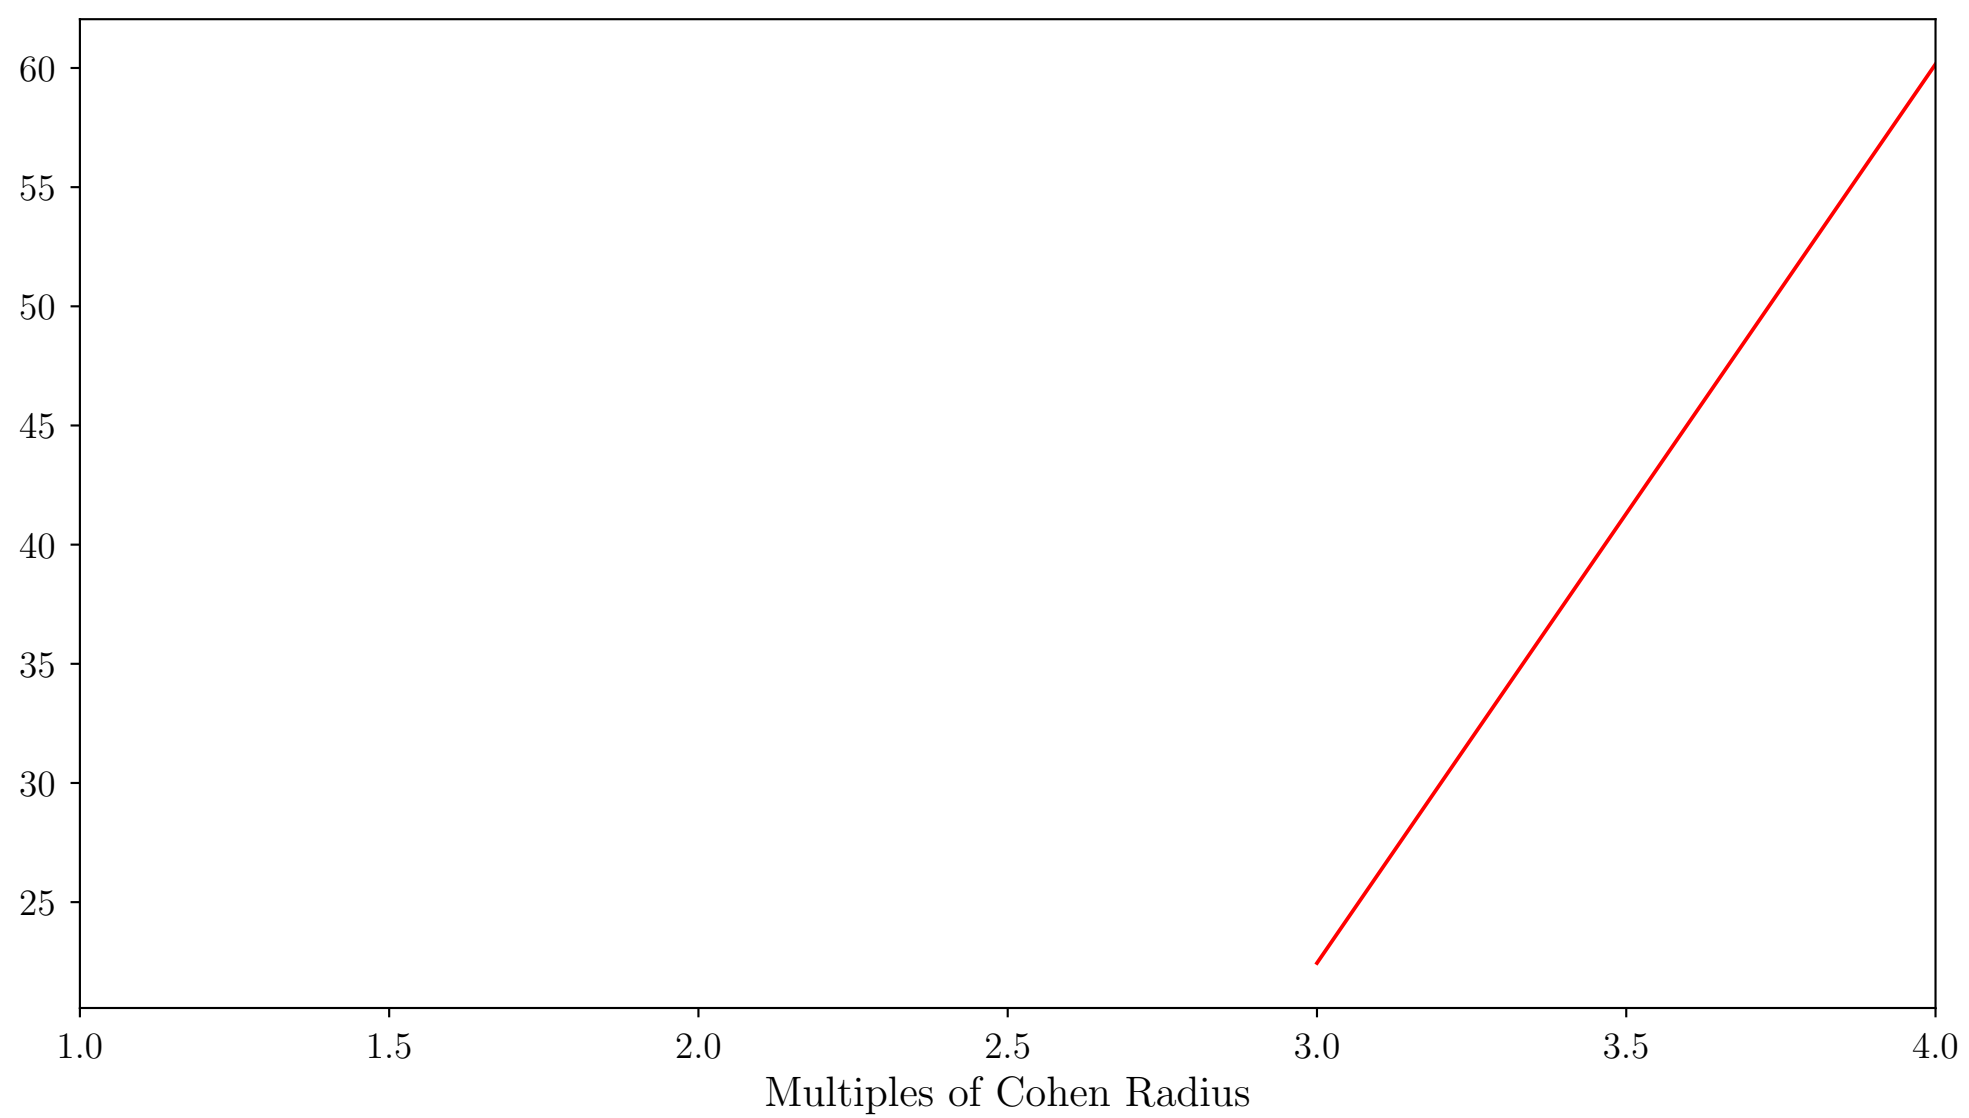

Supplement: supplementary_material [file attachment]

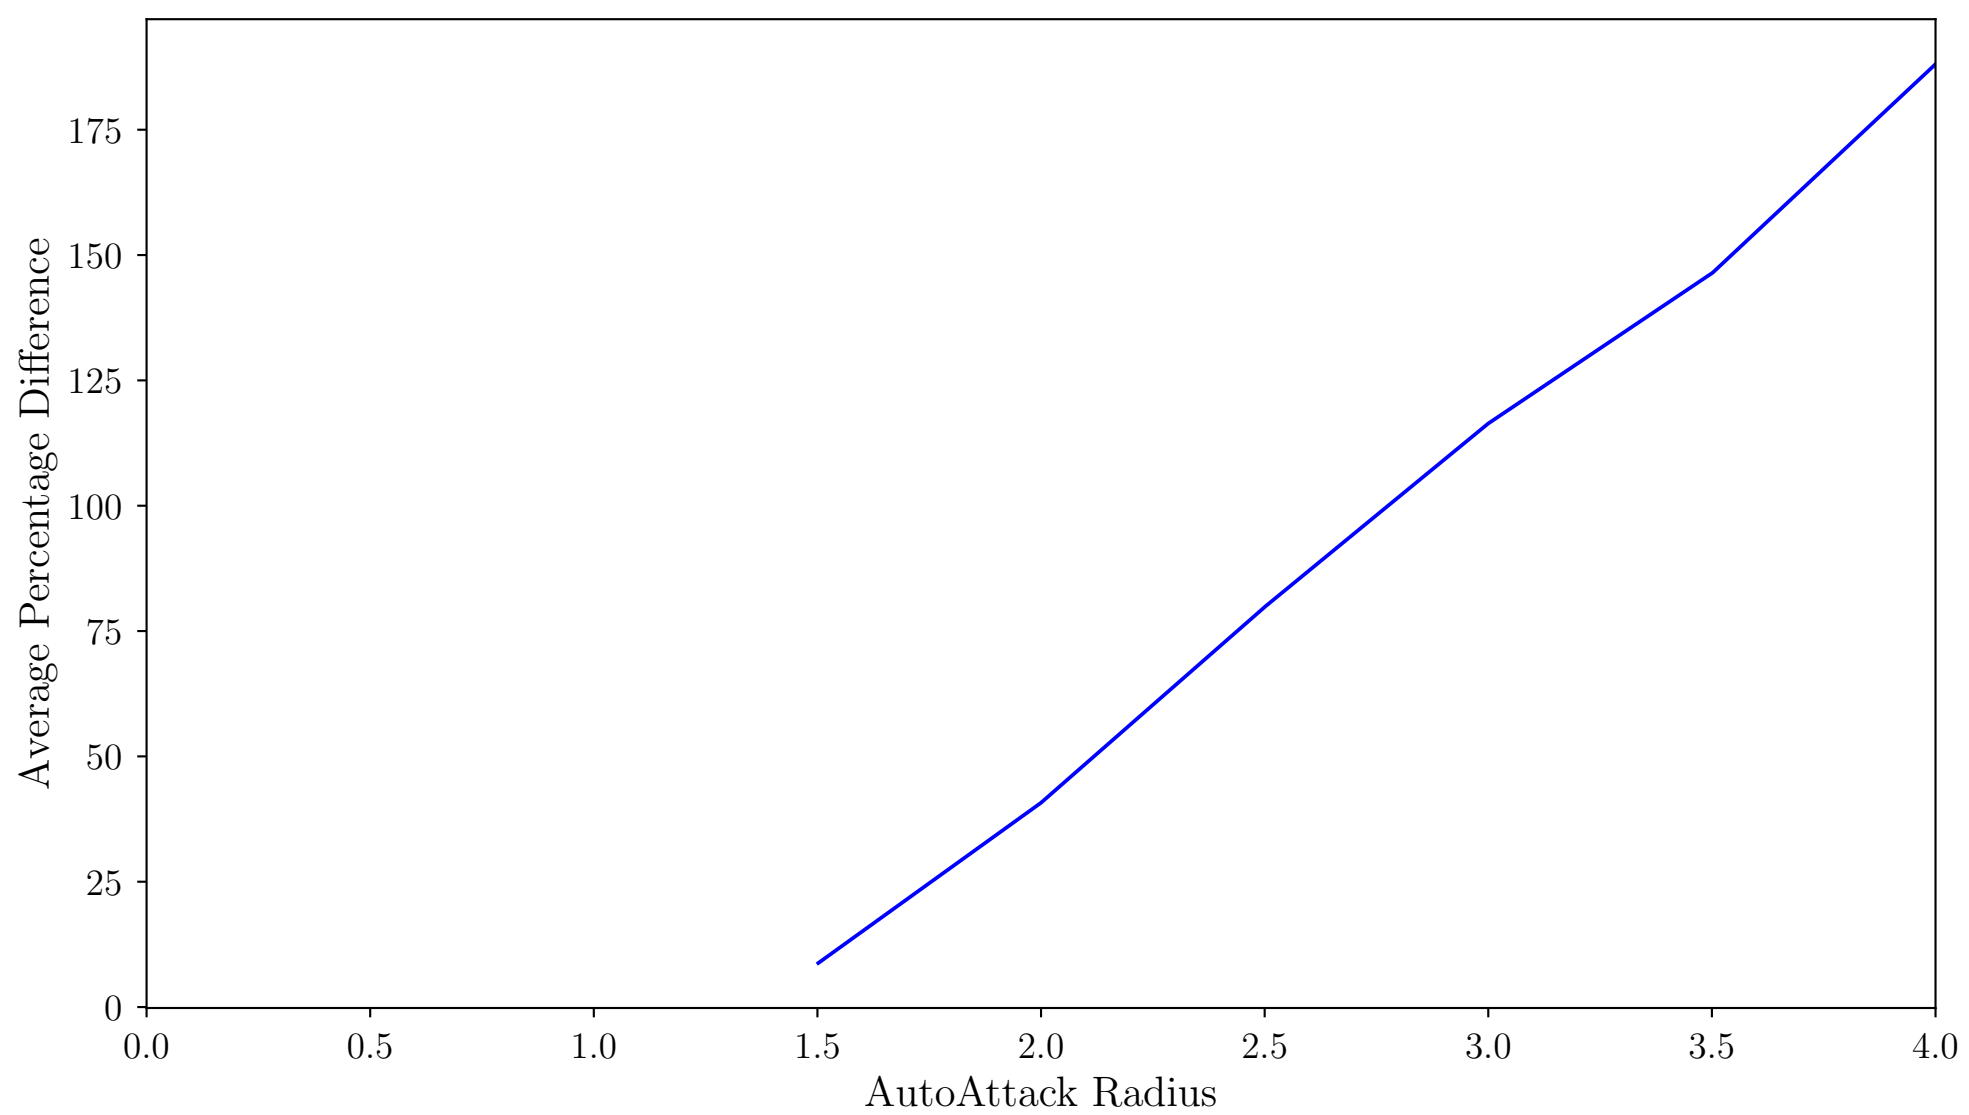

Supplement: supplementary_material [file attachment]

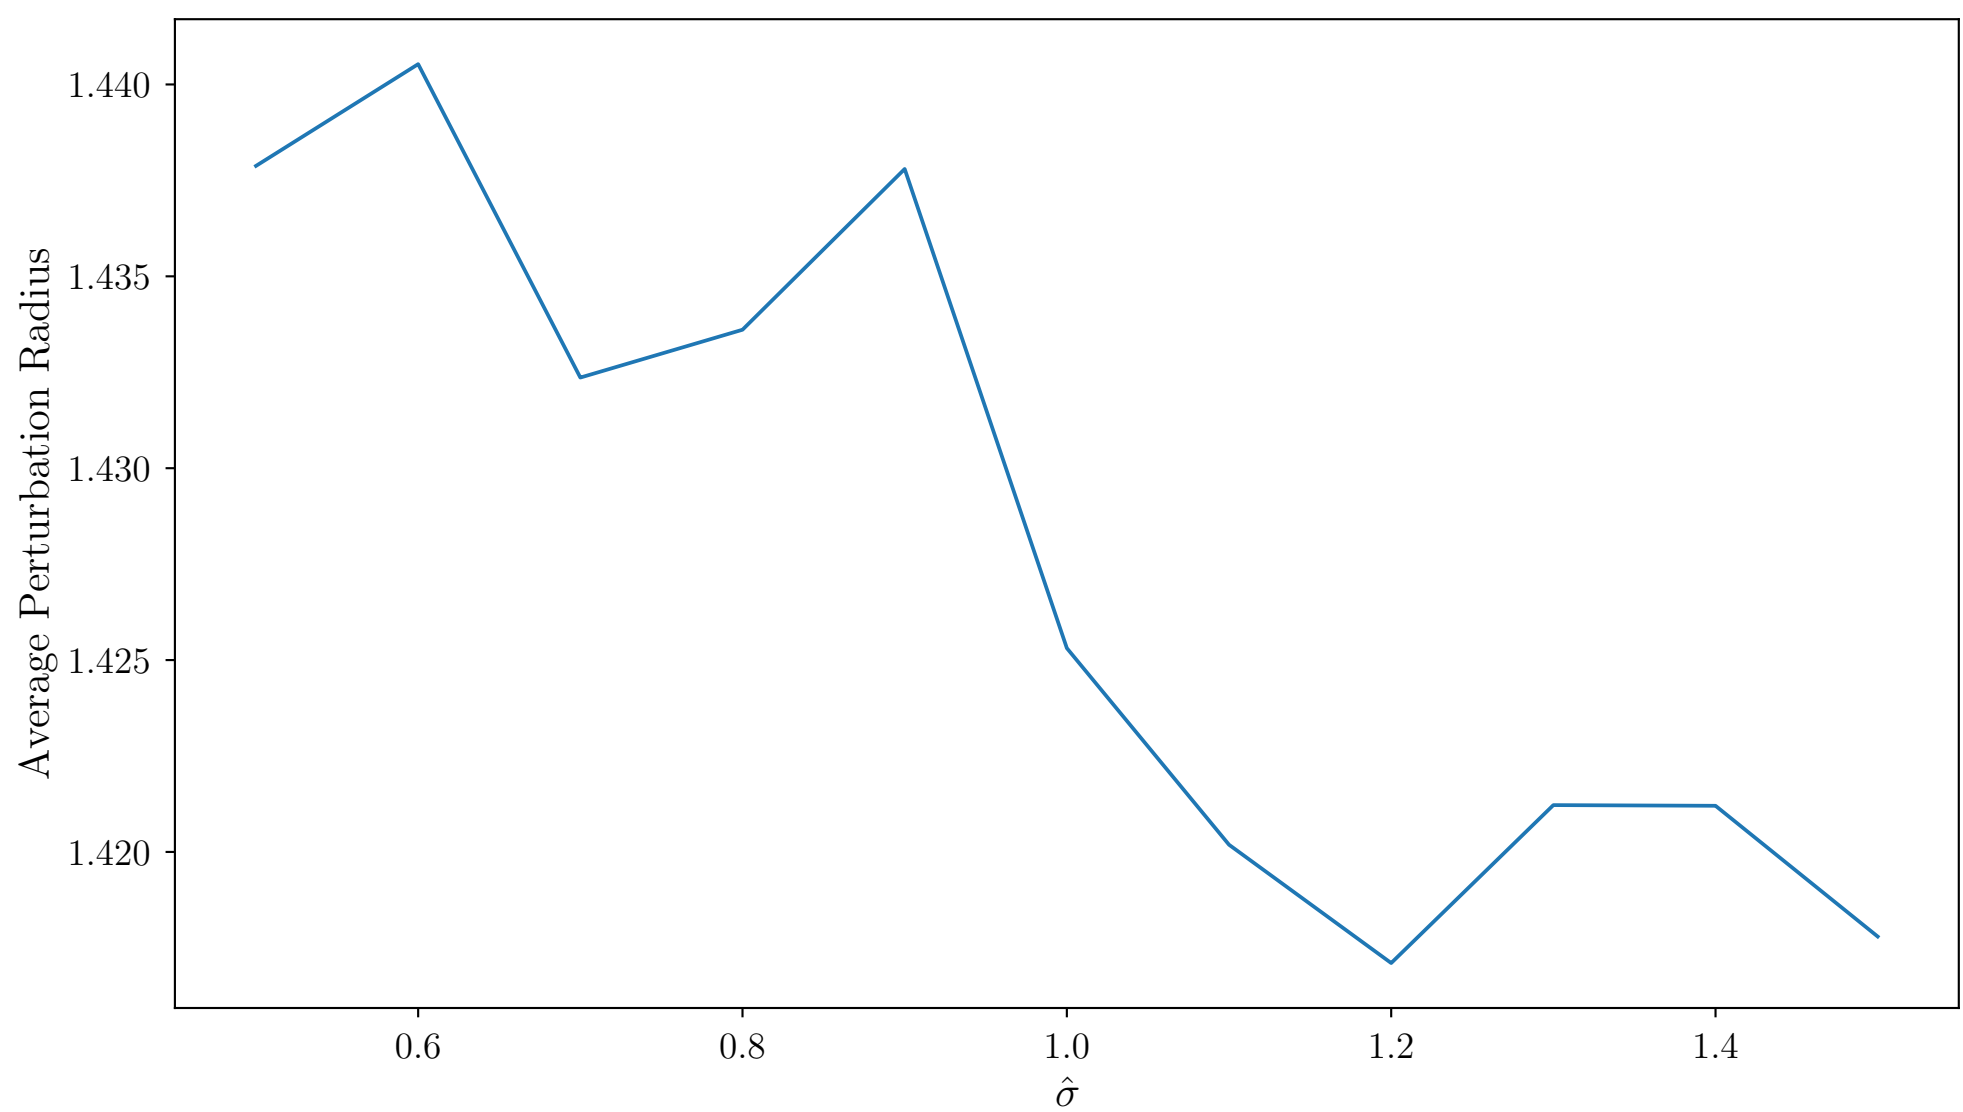

Supplement: supplementary_material [file attachment]
